# Supplementary material for: Verbal and psychological violence against women in Turkey and its determinants
Source: PubMed Central journal article supplement (PMC9550074; doi:10.1371/journal.pone.0275950), 2022-10-10
Supplement: pone.0275950.s001.pdf [file pone.0275950.s001.pdf]

**Appendix 1.** Estimated binary probit regression model results and marginal effects related to factors affecting women's exposure to verbal and psychological violence

| Variables                                                                           | $\beta$             | Std. Error | 95% CI |        | Elasticity (%)      | Std. Error |
|-------------------------------------------------------------------------------------|---------------------|------------|--------|--------|---------------------|------------|
|                                                                                     |                     |            | Lower  | Upper  |                     |            |
| <b>Survey year (reference: 2008)</b>                                                |                     |            |        |        |                     |            |
| 2014                                                                                | 0.083 <sup>a</sup>  | 0.027      | 0.029  | 0.136  | 8.23 <sup>a</sup>   | 0.027      |
| <b>Region (reference: west)</b>                                                     |                     |            |        |        |                     |            |
| South                                                                               | -0.011              | 0.043      | -0.095 | 0.072  | -1.16               | 0.043      |
| Middle                                                                              | 0.063 <sup>c</sup>  | 0.035      | -0.006 | 0.131  | 6.23 <sup>c</sup>   | 0.035      |
| South                                                                               | -0.066              | 0.042      | -0.148 | 0.015  | -6.83               | 0.043      |
| East                                                                                | 0.047               | 0.037      | -0.026 | 0.120  | 4.71                | 0.037      |
| <b>Place of residence (reference: rural)</b>                                        |                     |            |        |        |                     |            |
| Urban                                                                               | -0.01               | 0.03       | -0.064 | 0.050  | -0.69               | 0.029      |
| <b>Age (reference: 55+)</b>                                                         |                     |            |        |        |                     |            |
| 15-24                                                                               | 0.019               | 0.072      | -0.122 | 0.161  | 2.02                | 0.075      |
| 25-34                                                                               | 0.112 <sup>c</sup>  | 0.057      | 0.000  | 0.225  | 11.35 <sup>c</sup>  | 0.059      |
| 35-44                                                                               | 0.057               | 0.056      | -0.053 | 0.166  | 5.81                | 0.058      |
| 45-54                                                                               | 0.060               | 0.056      | -0.049 | 0.169  | 6.18                | 0.058      |
| <b>Educational level (reference: illiterate)</b>                                    |                     |            |        |        |                     |            |
| Elementary school                                                                   | 0.079 <sup>c</sup>  | 0.043      | -0.006 | 0.164  | 8.21 <sup>c</sup>   | 0.046      |
| Secondary school                                                                    | 0.096               | 0.062      | -0.025 | 0.216  | 9.90                | 0.059      |
| High school                                                                         | 0.154 <sup>b</sup>  | 0.060      | 0.037  | 0.270  | 15.60 <sup>b</sup>  | 0.058      |
| University                                                                          | 0.171 <sup>b</sup>  | 0.074      | 0.026  | 0.316  | 17.30 <sup>b</sup>  | 0.074      |
| <b>Individual earning/income (reference: no)</b>                                    |                     |            |        |        |                     |            |
| Yes                                                                                 | -0.017              | 0.035      | -0.085 | 0.051  | -1.68               | 0.035      |
| <b>Health insurance status (reference: no)</b>                                      |                     |            |        |        |                     |            |
| Yes                                                                                 | -0.083 <sup>b</sup> | 0.039      | -0.160 | -0.006 | -8.18 <sup>b</sup>  | 0.038      |
| <b>Marital status (reference: two and more)</b>                                     |                     |            |        |        |                     |            |
| Never married                                                                       | -0.272 <sup>b</sup> | 0.108      | -0.485 | -0.060 | -24.46 <sup>b</sup> | 0.097      |
| Once                                                                                | -0.318 <sup>a</sup> | 0.080      | -0.475 | -0.160 | -28.99 <sup>a</sup> | 0.066      |
| <b>Health status (reference: excellent/good)</b>                                    |                     |            |        |        |                     |            |
| Reasonable                                                                          | 0.147 <sup>a</sup>  | 0.029      | 0.090  | 0.205  | 14.91 <sup>a</sup>  | 0.030      |
| Bad/very bad                                                                        | 0.233 <sup>a</sup>  | 0.046      | 0.142  | 0.323  | 22.90 <sup>a</sup>  | 0.044      |
| <b>Number of children (reference: has no child)</b>                                 |                     |            |        |        |                     |            |
| One child                                                                           | 0.090               | 0.060      | -0.028 | 0.207  | 9.43                | 0.064      |
| Two and more                                                                        | 0.160 <sup>a</sup>  | 0.056      | 0.050  | 0.271  | 16.51 <sup>a</sup>  | 0.060      |
| <b>Exposure to violence by first-degree relatives (reference: no)</b>               |                     |            |        |        |                     |            |
| Yes                                                                                 | 0.334 <sup>a</sup>  | 0.045      | 0.246  | 0.423  | 30.78 <sup>a</sup>  | 0.038      |
| <b>Husband/partner's educational level (reference: elementary school)</b>           |                     |            |        |        |                     |            |
| Illiterate                                                                          | -0.048              | 0.073      | -0.192 | 0.095  | -5.03               | 0.077      |
| Secondary school                                                                    | 0.099 <sup>b</sup>  | 0.042      | 0.018  | 0.181  | 9.87 <sup>b</sup>   | 0.041      |
| High school                                                                         | 0.092 <sup>b</sup>  | 0.038      | 0.017  | 0.166  | 9.13 <sup>b</sup>   | 0.038      |
| University                                                                          | -0.027              | 0.052      | -0.129 | 0.075  | -2.79               | 0.054      |
| <b>Husband or partner's employment status (reference: no)</b>                       |                     |            |        |        |                     |            |
| Yes                                                                                 | -0.007              | 0.036      | -0.078 | 0.064  | -0.70               | 0.036      |
| <b>Husband or partner's alcohol use status (reference: no)</b>                      |                     |            |        |        |                     |            |
| Yes                                                                                 | 0.216 <sup>a</sup>  | 0.034      | 0.148  | 0.283  | 20.79 <sup>a</sup>  | 0.032      |
| <b>Husband or partner's gambling status (reference: no)</b>                         |                     |            |        |        |                     |            |
| Yes                                                                                 | 0.279 <sup>a</sup>  | 0.099      | 0.084  | 0.473  | 25.61 <sup>a</sup>  | 0.083      |
| <b>Husband or partner's drug use status (reference: no)</b>                         |                     |            |        |        |                     |            |
| Yes                                                                                 | 0.316               | 0.249      | -0.171 | 0.804  | 28.69               | 0.202      |
| <b>Husband or partner's cheating status (reference: no)</b>                         |                     |            |        |        |                     |            |
| Yes                                                                                 | 0.490 <sup>a</sup>  | 0.054      | 0.384  | 0.595  | 42.65 <sup>a</sup>  | 0.040      |
| <b>Status of exposure to husband or partner's economic violence (reference: no)</b> |                     |            |        |        |                     |            |

|                                                                                     |                     |       |        |        |                    |       |
|-------------------------------------------------------------------------------------|---------------------|-------|--------|--------|--------------------|-------|
| Yes                                                                                 | 0.367 <sup>a</sup>  | 0.032 | 0.305  | 0.429  | 34.56 <sup>a</sup> | 0.028 |
| <b>Status of exposure to husband or partner's physical violence (reference: no)</b> |                     |       |        |        |                    |       |
| Yes                                                                                 | 1.148 <sup>a</sup>  | 0.030 | 1.089  | 1.207  | 97.30 <sup>a</sup> | 0.024 |
| <b>Status of exposure to husband or partner's sexual violence (reference: no)</b>   |                     |       |        |        |                    |       |
| Yes                                                                                 | 0.772 <sup>a</sup>  | 0.049 | 0.676  | 0.868  | 62.23 <sup>a</sup> | 0.031 |
| <b>Constant</b>                                                                     | -0.991 <sup>a</sup> | 0.119 | -1.226 | -0.758 |                    |       |

<sup>a</sup>p<.01; <sup>b</sup>p<.05; <sup>c</sup>p<.10
